# Supplementary material for: Putting PhDs to Work: Career Planning for Today's Scientist
Source: Atypon-hosted journal article supplement (doi:10.1187/cbe-13-04-0085), 2014-03-01
Supplement: combinedsupmats1.pdf [file combinedsupmats1.pdf]

# Supplemental Material

*CBE—Life Sciences Education*

Hobin et al.

# IDP Survey Postdoctoral Administrator

## 1. Familiarity with IDP

Individual Development Plans (IDPs) provide a planning process to help postdocs identify their career objectives and professional development needs and establish milestones on the path to achieving their goals. To develop and implement an IDP, postdocs should—in cooperation with their mentors—assess their skills, abilities, and career objectives; explore career opportunities; write and execute an individually-tailored plan; and periodically review and revise their plan. For an overview of the IDP process, please visit: <http://opa.faseb.org/pdf/idp.pdf>.

\* 1. Prior to this survey, were you familiar with the IDP concept?

Yes

No

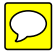

## 2. IDPs at your institution

\* 2. Does your institution recommend or require that postdocs develop an IDP with their faculty mentors?

Recommend

Require

Neither

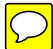

## 3. IDPs at your institution

\* 3. Who recommends or requires that postdocs develop an IDP? (Please check all that apply.)

Faculty mentor

Postdoctoral Office

Department Chair

Grants/Contracts or Sponsored Programs Office

Human Resources Office

Don't know

Other (please specify)

\* 4. Which IDP is recommended or required?

FASEB IDP

IDP modeled on FASEB IDP

Other IDP

Don't know

# IDP Survey Postdoctoral Administrator

5. How do you ensure that postdocs and their mentors develop an IDP?

\* 6. What percentage of postdocs at your institution develop an IDP with their mentors?

75 -100%

50-75%

25-50%

0-25%

Don't know

## 4. IDP dissemination

\* 7. How does your institution make postdocs aware of IDPs? (Please check all that apply.)

- Postdoctoral Office provides it directly to postdocs
- Human Resources Office provides it directly to postdocs
- Grants/Contracts or Sponsored Programs Office provides it directly to postdocs
- Department Chairs provide it directly to postdocs
- Faculty mentors provide it directly to postdocs
- Provided to postdocs via orientation package/session
- Posted on institution's webpage
- We do not make postdocs aware of the IDP
- Other (please specify)

# IDP Survey Postdoctoral Administrator

\* 8. How does your institution make faculty mentors aware of IDPs? (Please check all that apply.)

- Postdoctoral Office provides it directly to faculty
- Human Resources Office provides it directly to faculty
- Grants/Contracts or Sponsored Programs Office provides it directly to faculty
- Department Chairs provide it directly to faculty
- Provided to faculty mentors at career/professional development sessions
- Posted on institution's webpage
- We do not make faculty mentors aware of the IDP
- Other (please specify)

## 5. Career development resources

\* 9. Does your institution offer guidance or resources to help postdocs develop an IDP or other career/professional development plan?

- Resources to assist postdocs
- Resources to assist mentors in helping postdocs
- Both
- Neither 
- Don't know 

## 6. Career development resources

\* 10. What type of guidance or resources does your institution offer? (Please check all that apply.)

- Self assessment tools and/or workshops
- Career exploration/planning workshops
- Information about career opportunities for scientists
- Information about skills/abilities needed for various careers
- Career/professional development resources (e.g., interviewing, resume writing, communication tips)
- Seminars/workshops demonstrating the IDP process
- Other (please specify)

# IDP Survey Postdoctoral Administrator

## 7. Career development resources

\* 11. FASEB is considering developing additional resources to make it easier for postdocs and their mentors to develop an IDP. Please rate how useful you think the following resources would be:

|                                                                                                        | Not at all useful     |                       | Neutral               |                       | Very useful           | Don't know            |
|--------------------------------------------------------------------------------------------------------|-----------------------|-----------------------|-----------------------|-----------------------|-----------------------|-----------------------|
| Self assessment tools                                                                                  | <input type="radio"/> |
| Self assessment workshops                                                                              | <input type="radio"/> |
| Career exploration/planning workshops                                                                  | <input type="radio"/> |
| Information about career opportunities for scientists                                                  | <input type="radio"/> |
| Information about skills/abilities needed for various careers                                          | <input type="radio"/> |
| Professional development resources (e.g., interviewing, resume writing, communication tips)            | <input type="radio"/> |
| IDP "user's manual" that provides in-depth information and resources for each stage of the IDP process | <input type="radio"/> |
| Video to help mentors and postdocs understand the IDP process                                          | <input type="radio"/> |
| Role playing scenario (script) that could be used as part of an IDP workshop                           | <input type="radio"/> |
| A description of the benefits of completing an IDP                                                     | <input type="radio"/> |
| Case studies describing the impact completing an IDP has had on specific postdocs and mentors          | <input type="radio"/> |
| Template for creating IDP workshops, including suggestions for topics and speakers                     | <input type="radio"/> |
| Customizable PowerPoint presentations describing the IDP process                                       | <input type="radio"/> |

12. Are there other resources you would find useful? (please specify)

\* 13. Would it be useful to adapt the IDP for graduate students or early career faculty?

Graduate students

Early career faculty

Both

Neither

Don't know

Do you have any suggestions for adapting the IDP for these groups?

## 8. Institutional information

# IDP Survey Postdoctoral Administrator

\* 14. Does your institution have an administrative office dedicated to postdoctoral affairs?

Yes

No

\* 15. In what capacity are you responding to this survey?

Dean of postdoctoral affairs

Postdoctoral affairs office staff

Other institutional official responsible for postdoctoral affairs

Postdoctoral association leader

Postdoctoral scholar

Other (please specify)

\* 16. Please indicate in which school or division the postdocs represented by your office reside. (Please check all that apply.)

Medical school

Graduate school

School other than medical or graduate school

Affiliated hospital

Institute or center

Office represents all postdocs at institution

Other (please specify)

\* 17. How many postdocs is your office responsible for?

Fewer than 50

50-100

100-500

500-1000

Over 1000

Don't know

# IDP Survey Postdoctoral Administrator

\* 18. What is the size of your institution's postdoc population?

Fewer than 50

50-100

100-500

500-1000

Over 1000

Don't know

\* 19. Approximately how many faculty are actively engaged in research at your institution?

Fewer than 50

50-100

100-500

500-1000

Over 1000

Don't know

20. Please indicate for which institution you are responding.

## 9. Additional Information

21. Please note any additional suggestions you may have for improving the IDP or increasing its visibility among postdocs or their mentors.

22. Is there anything else you would like to add about your experience with the IDP?

23. May we contact you for additional information? If so, please include your name and contact information. (Reminder: all responses will be kept confidential.)

## 10. Thank you

Thank you for your time!

For more information about this survey or individual development plans, please contact Jennifer A. Hobin, Ph.D. at [jhobin@faseb.org](mailto:jhobin@faseb.org) or 301-634-7650.

# Faculty IDP Survey

## 1. Familiar with IDP

Individual Development Plans (IDPs) provide a planning process to help postdocs identify their career objectives and professional development needs and establish milestones on the path to achieving their goals. To develop and implement an IDP, postdocs should—in cooperation with their mentors—assess their skills, abilities, and career objectives; explore career opportunities; write and execute an individually-tailored plan; and periodically review and revise their plan. For an overview of the IDP process, please visit: <http://opa.faseb.org/pdf/idp.pdf>.

\* 1. Prior to this survey, were you familiar with the IDP concept?

Yes

No →

## 2. Hear about IDP

\* 2. How did you find out about the IDP? (Please check all that apply.)

Postdoc(s) provided it to me

Postdoctoral Office provided it to me

Human Resources Office provided it to me

Grants/Contracts or Sponsored Programs Office provided it to me

Department Chair provided it to me

Heard about it through colleagues

Institution's website

Career/professional development session at my institution

Career/professional development session at professional society meeting

Professional society email, newsletter, or website

National Postdoctoral Association

Other (please specify)

\* 3. Do you currently supervise or have you ever supervised postdoctoral scholars?

No →

Yes. How many in total?

## 3. Help postdocs develop IDP



# Faculty IDP Survey

\* 4. Have you helped any of your postdocs develop an IDP?

Yes 

No

## 4. Help postdocs develop IDP

\* 5. Why haven't you helped your postdocs develop an IDP? (Please check all that apply.)

- Postdocs did not ask to complete an IDP
- Not required to complete an IDP with postdocs
- Postdoc are responsible for developing their own career plans
- IDP is not needed because postdocs have already decided on a career
- Did not have information about career opportunities for postdocs
- Did not know what skills are required for various careers
- Did not feel comfortable assessing postdocs' skills and abilities
- Did not have time
- No reason—just did not complete
- Other (please specify)

## 5. Have postdocs

\* 6. Do you currently supervise or have you ever supervised postdoctoral scholars?

No 

Yes. How many in total?

## 6. Help postdocs develop career plan

\* 7. Have you ever helped your postdocs develop a career/professional development plan?

Yes 

No

## 7. Help postdocs develop career plan

# Faculty IDP Survey

\* 8. Why haven't you helped your postdocs develop a career/professional development plan? (Please check all that apply.)

- Postdocs did not ask to develop a career plan
- Not required to develop a career plan with postdocs
- Postdoc are responsible for developing their own career plans
- Career plans not needed because postdocs have decided on a career
- Did not know what career opportunities are available to postdocs
- Did not know what skills are required for various careers
- Did not have time
- No reason—just did not
- Other (please specify)

## 8. Willing to develop plan

\* 9. Would you be willing to help your postdocs develop a career/professional development plan?

- Yes
- No
- Maybe

## 9. How helpful is the IDP

\* 10. Please rate how helpful you found the IDP process to be for each of the following:

|                                                                                                                                                      | Not at all helpful    |                       | Neutral               |                       | Very helpful          |
|------------------------------------------------------------------------------------------------------------------------------------------------------|-----------------------|-----------------------|-----------------------|-----------------------|-----------------------|
| Helping your postdocs assess their skills and abilities                                                                                              | <input type="radio"/> |
| Helping your postdocs identify careers of interest to them                                                                                           | <input type="radio"/> |
| Helping your postdocs identify the research skills they will need to advance their chosen careers                                                    | <input type="radio"/> |
| Helping your postdocs identify the additional skills they will need to advance their chosen careers (e.g., communication, management, grant writing) | <input type="radio"/> |
| Facilitating communication with your postdocs about their career goals                                                                               | <input type="radio"/> |
| How helpful was the IDP process overall?                                                                                                             | <input type="radio"/> |

# Faculty IDP Survey

\* 11. Do you review your postdocs' IDPs annually, or is there some other formal review of their progress?

Yes →

No

## 10. Review progress

\* 12. Why don't you review your postdocs' progress? (Please check all that apply.)

- Not required to review postdocs' progress
- Postdocs haven't asked me to review their progress
- Not comfortable giving/receiving feedback
- Reviews are not useful for postdocs' career progression
- Feedback is ongoing in course of other regular meetings
- Do not have time
- Other (please specify)

## 11. Career development resources

\* 13. Does your institution offer guidance or resources to help postdocs develop an IDP or other career/professional development plan?

Yes

No →

Don't know →

## 12. Type of guidance

# Faculty IDP Survey

\* 14. What type of guidance or resources does your institution offer? (Please check all that apply.)

- Self assessment tools and/or workshops
- Career exploration/planning workshops
- Information about career opportunities for scientists
- Information about skills/abilities needed for various careers
- Career/professional development resources (e.g., interviewing, resume writing, communication tips)
- Seminars/workshops demonstrating the IDP process
- Other (please specify)

## 13. Career development resources

\* 15. FASEB is considering developing additional resources to make it easier for postdocs to develop an IDP with their mentors. Please rate how useful you think the following resources would be:

|                                                                                                          | Not at all useful |    | Neutral |    | Very useful | Don't know |
|----------------------------------------------------------------------------------------------------------|-------------------|----|---------|----|-------------|------------|
| Self assessment tools for postdocs                                                                       | jñ                | jñ | jñ      | jñ | jñ          | jñ         |
| Self assessment workshops for postdocs                                                                   | jñ                | jñ | jñ      | jñ | jñ          | jñ         |
| Information about career opportunities for scientists                                                    | jñ                | jñ | jñ      | jñ | jñ          | jñ         |
| Information about skills/abilities needed for various careers                                            | jñ                | jñ | jñ      | jñ | jñ          | jñ         |
| Career exploration/planning workshops for postdocs                                                       | jñ                | jñ | jñ      | jñ | jñ          | jñ         |
| Professional development resources for postdocs (e.g., interviewing, resume writing, communication tips) | jñ                | jñ | jñ      | jñ | jñ          | jñ         |
| Information to help faculty improve their mentoring                                                      | jñ                | jñ | jñ      | jñ | jñ          | jñ         |
| Workshops to help faculty improve their mentoring                                                        | jñ                | jñ | jñ      | jñ | jñ          | jñ         |
| IDP "user's manual" that provides in-depth information and resources for each stage of the IDP process   | jñ                | jñ | jñ      | jñ | jñ          | jñ         |
| Video to help mentors and postdocs understand the IDP process                                            | jñ                | jñ | jñ      | jñ | jñ          | jñ         |
| A description of the benefits of completing an IDP that mentors could share with their postdocs          | jñ                | jñ | jñ      | jñ | jñ          | jñ         |
| Case studies describing the impact completing an IDP has had on specific postdocs and mentors            | jñ                | jñ | jñ      | jñ | jñ          | jñ         |

16. Are there any other resources you would find useful? (please specify)

# Faculty IDP Survey

\* 17. Would it be useful to adapt the IDP for graduate students or early career faculty?

Graduate students

Early career faculty

Both

Neither

Don't know

Do you have any suggestions for adapting the IDP for these groups?

18. Please note any additional suggestions you may have for improving the IDP or increasing its visibility among mentors.

19. Is there anything else you would like to add about your experience with the IDP?

## 14. Institution

\* 20. Which scientific or professional societies are you a member of?

\* 21. What is your job title?

Research Scientist

Assistant Professor

Associate Professor

Full Professor

Dean

Other (please specify)

22. Please indicate at which institution you work.

## 15. Contact

## Faculty IDP Survey

23. May we contact you for additional information? If so, please include your name and contact information. (Reminder: all responses will be kept confidential.)

## 16. Thank you

Thank you for your time!

For more information about this survey or individual development plans, please contact Jennifer A. Hobin, Ph.D. at [jhobin@faseb.org](mailto:jhobin@faseb.org) or 301-634-7650.

# Postdoc Survey

## 1. Familiarity with IDP

Individual Development Plans (IDPs) provide a planning process to help postdocs identify their career objectives and professional development needs and establish milestones on the path to achieving their goals. To develop and implement an IDP, postdocs should—in cooperation with their mentors—assess their skills, abilities, and career objectives; explore career opportunities; write and execute an individually-tailored plan; and periodically review and revise their plan. For an overview of the IDP process, please visit: <http://opa.faseb.org/pdf/idp.pdf>.

\* 1. Prior to this survey, were you familiar with the IDP concept?

Yes

No 

## 2. Hear about IDP

\* 2. How did you find out about the IDP? (Please check all that apply.)

- Faculty mentor provided it to me
- Postdoctoral Office provided it to me
- Human Resources Office provided it to me
- Grants/Contracts or Sponsored Programs Office provided it to me
- Department Chair provided it to me
- Institution's postdoctoral association provided it to me
- Heard about it through colleagues
- Career/professional development session at my institution
- Career/professional development session at professional society meeting
- Included in postdoctoral orientation package/session
- Professional society email, newsletter, or website
- National Postdoctoral Association
- Institution's website
- Other (please specify)

## 3. IDPs at your institution

\* 3. Is it recommended or required that you develop an IDP with your faculty mentor?

Recommended

Required

Neither 

## 4. Who recommends?

# Postdoc Survey

\* 4. Who recommends or requires that you develop an IDP? (Please check all that apply.)

- Faculty mentor
- Department Chair
- Postdoctoral Office
- Human Resources Office
- Grants/Contracts or Sponsored Programs Office
- Don't know
- Other (please specify)

\* 5. Which IDP is recommended or required?

- FASEB IDP
- IDP modeled on FASEB IDP
- Other IDP
- Don't know

## 5. IDP completion

\* 6. Have you ever completed all or part of an IDP?

- Yes 
- No

## 6. IDP completion



# Postdoc Survey

\* 7. Why haven't you completed an IDP? (Please check all that apply.) 

- Did not know how to conduct a self-assessment
- Did not have knowledge of possible careers
- Did not know where to find information about careers
- Did not know what skills were required for various careers
- Did not feel comfortable seeking feedback from mentor or others
- Already decided on a career
- Not required to complete an IDP
- Did not have time
- No reason—just did not complete
- Other (please specify)

## 7. First IDP step

\* 8. The first step of the IDP calls for a self assessment. Was this completed?

Yes 

No

## 8. First IDP step

\* 9. Why didn't you complete a self assessment? (Please check all that apply.)

- Did not know how to conduct a self-assessment
- Did not feel comfortable seeking feedback from mentor or others
- Did not think assessment was needed for completion of IDP
- Already aware of my skills and abilities
- Did not have time
- No reason—just did not complete
- Other (please specify)

## 9. Second IDP step

\* 10. The second step of the IDP is to survey career opportunities. Did you do this?

Yes 

No

# Postdoc Survey

## 10. Second IDP step

\* 11. Why didn't you survey career opportunities? (Please check all that apply.)

- Did not have knowledge of possible careers
- Did not know where to find information about careers
- Did not think survey of career opportunities was needed for completion of IDP
- Already decided on a career
- Did not have time
- No reason—just did not complete
- Other (please specify)

## 11. Discuss IDP

\* 12. Did you discuss your IDP with your mentor?

Yes 

No

## 12. Discuss IDP

\* 13. Why didn't you discuss your IDP with your mentor? (Please check all that apply.)

- Did not expect my mentor to be supportive of my career interests
- Did not think my mentor had time to discuss IDP with me
- Did not think my mentor had experience or resources to be helpful
- Concerned I might face negative consequences from my mentor
- Not comfortable giving/receiving feedback
- No reason-just did not discuss with my mentor
- Other (please specify)

## 13. Review progress

\* 14. Do you review your IDP with your mentor annually, or is there some other formal review of your progress?

Yes 

No

# Postdoc Survey

## 14. Review progress

\* 15. Why don't you review your progress with your mentor? (Please check all that apply.)

- Not required for continuing postdoc appointment
- Not comfortable giving/receiving feedback
- Reviews are not useful for my career progression
- Feedback is ongoing in course of other regular meetings
- Mentor is typically not available
- Mentor believes it is not necessary unless there are specific problems
- Other (please specify)

## 15. How helpful is the IDP?

\* 16. Please rate how helpful you found the IDP process to be for each of the following:

|                                                                                                                                | Not at all helpful       |                          | Neutral                  |                          | Very helpful             |
|--------------------------------------------------------------------------------------------------------------------------------|--------------------------|--------------------------|--------------------------|--------------------------|--------------------------|
| Assessing your skills and abilities                                                                                            | <input type="checkbox"/> |
| Identifying careers of interest to you                                                                                         | <input type="checkbox"/> |
| Identifying the research skills you will need to advance your chosen career                                                    | <input type="checkbox"/> |
| Identifying the additional skills you will need to advance your chosen career (e.g., communication, management, grant writing) | <input type="checkbox"/> |
| Facilitating communication about your career goals with your mentor                                                            | <input type="checkbox"/> |
| How helpful was the IDP process overall?                                                                                       | <input type="checkbox"/> |

## 16. Career development resources

\* 17. Does your institution offer guidance or resources to help postdocs develop an IDP or other career/professional development plan?

Yes

No 

Don't know 

## 17. Type of guidance

# Postdoc Survey

\* 18. What type of guidance or resources does your institution offer? (Please check all that apply.)

- Self assessment tools and/or workshops
- Career exploration/planning workshops
- Information about career opportunities for scientists
- Information about skills/abilities needed for various careers
- Career/professional development resources (e.g., interviewing, resume writing, communication tips)
- Seminars/workshops demonstrating the IDP process
- Other (please specify)

## 18. Career development resources

\* 19. FASEB is considering developing additional resources to make it easier for postdocs and their mentors to develop an IDP. Please rate how useful you think the following resources would be:

|                                                                                                        | Not at all useful     |                       | Neutral               |                       | Very useful           | Don't know            |
|--------------------------------------------------------------------------------------------------------|-----------------------|-----------------------|-----------------------|-----------------------|-----------------------|-----------------------|
| Self assessment tools                                                                                  | <input type="radio"/> |
| Self assessment workshops                                                                              | <input type="radio"/> |
| Career exploration/planning workshops                                                                  | <input type="radio"/> |
| Information about career opportunities for scientists                                                  | <input type="radio"/> |
| Information about skills/abilities needed for various careers                                          | <input type="radio"/> |
| Professional development resources (e.g., interviewing, resume writing, communication tips)            | <input type="radio"/> |
| IDP "user's manual" that provides in-depth information and resources for each stage of the IDP process | <input type="radio"/> |
| Video to help mentors and postdocs understand the IDP process                                          | <input type="radio"/> |
| A description of the benefits of completing an IDP that postdocs could share with their mentors        | <input type="radio"/> |
| Case studies describing the impact completing an IDP has had on specific postdocs and mentors          | <input type="radio"/> |
| Suggestions for ways postdocs could encourage their mentors to complete an IDP with them               | <input type="radio"/> |

20. Are there any other resources you would find useful? (please specify)

21. Please note any additional suggestions you may have for improving the IDP or increasing its visibility among postdocs or their mentors.

## Postdoc Survey

22. Is there anything else you would like to add about your experience with the IDP?

### 19. Postdoc status

\* 23. Are you a current or former postdoc?

Current postdoc

Former postdoc

### 20. Institution

24. At what institution are you doing your postdoctoral work?

### 21. Last postdoc appointment

25. When did you complete your last postdoctoral appointment?

### 22. Contact

26. May we contact you for additional information? If so, please include your name and contact information. (Reminder: all responses will be kept confidential.)

### 23. Thank you

Thank you for your time!

For more information about this survey or individual development plans, please contact Jennifer A. Hobin, Ph.D. at [jhobin@faseb.org](mailto:jhobin@faseb.org) or 301-634-7650.
